# Supplementary material for: Daytime Sleepiness from Preschool Children’s and Parents’ Perspectives: Is There a Difference?
Source: MDPI journal article supplement (doi:10.3390/children11050568), 2024-05-08
Supplement: s1 [file s1]

**Table S1.** Frequency of electronic devices usage at bedtime in three categories of sleep latency during the weekday

|                                               |            | Sleep latency |                  |              | <i>p</i> * |
|-----------------------------------------------|------------|---------------|------------------|--------------|------------|
|                                               |            | ≤ 10 minutes  | 10 to 20 minutes | > 20 minutes |            |
| <b>Watching computer or tablet at bedtime</b> | <b>No</b>  | 64 (53.3)     | 23 (19.2)        | 33 (27.5)    | 0.014      |
|                                               | <b>Yes</b> | 21 (35)       | 23 (38.3)        | 16 (26.7)    |            |
| <b>Watching TV at bedtime</b>                 | <b>No</b>  | 24 (54.5)     | 10 (22.7)        | 10 (22.7)    | 0.498      |
|                                               | <b>Yes</b> | 63 (44.7)     | 36 (25.5)        | 42 (29.8)    |            |
| <b>Playing digital games at bedtime</b>       | <b>No</b>  | 81 (50.3)     | 35 (21.7)        | 45 (28)      | 0.011      |
|                                               | <b>Yes</b> | 5 (21.7)      | 11 (47.8)        | 7 (30.4)     |            |

\*Chi square test

**Table S2.** Frequency of electronic devices usage at bedtime in three categories of sleep latency during the weekend

|                                               |            | Sleep latency |                  |              | <i>p</i> * |
|-----------------------------------------------|------------|---------------|------------------|--------------|------------|
|                                               |            | ≤ 10 minutes  | 10 to 20 minutes | > 20 minutes |            |
| <b>Watching computer or tablet at bedtime</b> | <b>No</b>  | 62 (52.5)     | 22 (18.7)        | 34 (28.8)    | 0.007      |
|                                               | <b>Yes</b> | 18 (31.6)     | 22 (38.6)        | 17 (29.8)    |            |
| <b>Watching TV at bedtime</b>                 | <b>No</b>  | 22 (52.4)     | 9 (21.4)         | 11 (26.2)    | 0.602      |
|                                               | <b>Yes</b> | 61 (43.6)     | 35 (25.0)        | 44 (31.4)    |            |
| <b>Playing digital games at bedtime</b>       | <b>No</b>  | 77 (48.4)     | 33 (20.8)        | 49 (30.8)    | 0.008      |
|                                               | <b>Yes</b> | 5 (22.7)      | 11 (50.0)        | 6 (27.3)     |            |

\*Chi square test
